# Supplementary material
Source: Elsevier journal article supplement (https://www.sciencedirect.com/science/article/pii/S2173507715001866)
Supplement: mmc1 [file S2173507715001866:mmc1.docx]

Anexo 1. Centros hospitalarios de la muestra.

Andalucía: H. Valle de los Pedroches, H.General de Baza, Complejo Hospitalario Punta de Europa, Complejo Hospitalario de Torrecárdenas, H. General de Jerez de la Frontera, Complejo Hospitalario Juan Ramón Jiménez, H. Universitario Puerta del Mar, Complejo Hospitalario Ciudad de Jaén, Complejo Hospitalario Reina Sofía, H. Universitario Virgen de las Nieves, Complejo Hospitalario Carlos Haya, H. Universitario Virgen del Rocío.

Aragón: H.G. Obispo Polanco, H. Miguel Servet, H. Ernest Lluch Martín, H. Clínico Universitario Lozano Blesa.

Asturias: H. Central de Asturias.

Cantabria: H. Valdecilla.

Castilla La Mancha: H. General de Ciudad Real, H. Universitario de Guadalajara, Complejo Universitario de Toledo, Complejo Hospital general de Albacete.

Castilla y León: Complejo Asistencial de Palencia, Complejo Hospitalario de Segovia, Complejo Hospitalario de Soria, Complejo Asistencial de Zamora, H. de Medina del Campo, H. de León, H. Universitario del Rio Hortega, Complejo Asistencial de Burgos, Complejo Asistencial de Salamanca.

Cataluña: H. de Figueres, H. del Mar, H. Mutua de Terrasa, H. Doctor Josep Trueta, H. Universitari Arnau de Vilanova, H. Universitari Joan XXIII, Corporació Sanitària Parc Taulí, H. Clìnic i Provincial de Barcelona, H. Germans Trias i Pujol, Ciutat Sanitaria de Bellvitge Princeps d'Espanya, H. General Universitari Vall d'Hebró.

Ceuta y Melilla: H. de la Cruz Roja de Ceuta, H. de Melilla.

Euskadi: H. Txagorritxu, H. de Galdakao, H. de Donostia, Hospital de Cruces.

Extremadura: Complejo Hospitalario de Cáceres, Complejo Universitario de Badajoz, H. General de Llerena.

Galicia: Complejo Hospitalario Arquitecto Marcide-Novoa Santos, Complejo Hospitalario de Pontevedra, Complejo Hospitalario de Ourense, Complejo Universitario de Vigo, Complejo Hospitalario Juan Canalejo-Marítimo de Oza, Complejo Universitario de Santiago.

Islas Baleares: Fundación Hospital Manacor, H. Son Llàtzer, Complejo Asistencial de Son Dureta.

Islas Canarias: H. General de Lanzarote, H. General de Fuerteventura, H. Doctor Negrín, H. Universitario de Canarias, Complejo Hospitalario Ntra. Sra. de Candelaria-Ofra.

La Rioja: Complejo Hospitalario San Millán-San Pedro.

Madrid: H. Universitario Príncipe de Asturias, H. Severo Ochoa, Complejo Universitario de Móstoles, H. de Fuenlabrada, H. Universitario de Getafe, H. Universitario de la Princesa, H. Universitario Puerta de Hierro, H. Ramón y Cajal, H. 12 de octubre, H. General Universitario Gregorio Marañón, Complejo Universitario La Paz.

Murcia: H. General Universitario de Murcia, H. Universitario Virgen de la Arrixaca.

Navarra: H. Virgen del Camino, H. de Navarra.

Valencia: H. General Universitario de Elche, H. Universitari Sant Joan d'Alacant, H. General Universitario de Alicante, H. General de Castelló, H. General Universitario de Valencia, H. Universitario La Fe.
